# Supplementary material
Source: PubMed Central journal article supplement (PMC5007782)
Supplement: AEM.01131-16_zam999117395so1.pdf [file AEM.01131-16_zam999117395so1.pdf]

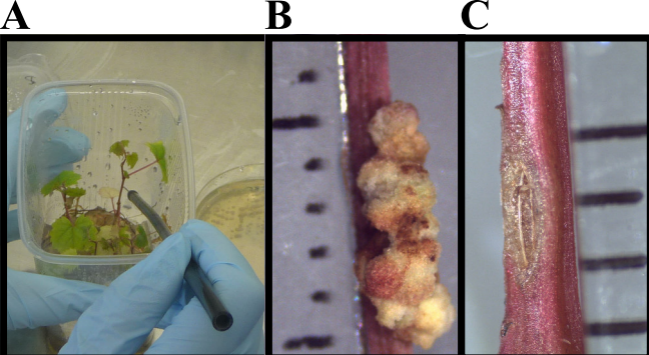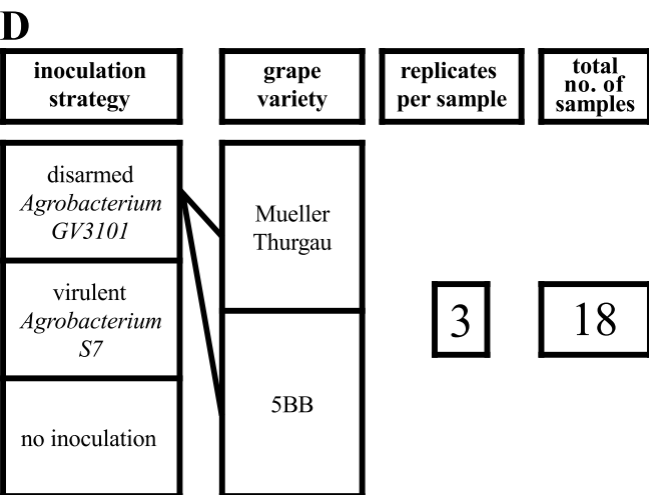

**FIG S1** Infection procedure of in vitro cultivated grapevine plantlets. (A) Inoculation of agrobacteria into grapevine stems using a needle. (B) Grapevine stems with a crown gall and (C) mock-inoculated stems without a crown gall. Scale bar distance in B and C is 1 mm. (D) Experimental setup and number of samples used for amplicon sequencing.

**TABLE S1** Classification of the grapevine-associated microbiota attained by performing a supervised learning analysis according to the factor sampling site (Random Forest). The predicted sample site classifications (soil, root, graft union, cane; horizontal) were compared to the known classifications of the sample sites (vertical). The percentage of wrongly classified samples within one sample site is called class error while the percentage of wrongly classified samples of all classified samples is termed the out-of-bag error (OOB: 2%).

| OOB: 2%     | <b>soil</b> | <b>root</b> | <b>graft<br/>union</b> | <b>cane</b> | <b>class<br/>error</b> |
|-------------|-------------|-------------|------------------------|-------------|------------------------|
| Soil        | 35          | 0           | 0                      | 0           | 0%                     |
| Root        | 0           | 32          | 0                      | 2           | 6%                     |
| Graft Union | 0           | 0           | 35                     | 1           | 3%                     |
| Cane        | 0           | 0           | 0                      | 35          | 0%                     |

**TABLE S2** Grapevine-associated microbiota were used to perform a supervised learning analysis (Random Forest) according to the factor season. Predicted classifications of the samples into spring, summer and autumn (horizontal) were compared to the known classifications in spring summer and autumn (vertical). The percentage of wrongly classified samples within one season is called class error while the percentage of wrongly classified samples within one sample site (soil, root, graft union, cane) is called out-of-bag error (OOB).

| <i>Soil</i><br>OOB: 11% |               |               |               | <b>Class</b> |
|-------------------------|---------------|---------------|---------------|--------------|
|                         | <b>spring</b> | <b>summer</b> | <b>autumn</b> | <b>Error</b> |
| spring                  | 8             | 3             | 0             | 27%          |
| summer                  | 1             | 11            | 0             | 8%           |
| autumn                  | 0             | 0             | 12            | 0%           |

| <i>Root</i><br>OOB: 21% |               |               |               | <b>Class</b> |
|-------------------------|---------------|---------------|---------------|--------------|
|                         | <b>spring</b> | <b>summer</b> | <b>autumn</b> | <b>Error</b> |
| spring                  | 7             | 5             | 0             | 42%          |
| summer                  | 1             | 10            | 0             | 9%           |
| autumn                  | 1             | 0             | 10            | 9%           |

| <i>Graft Union</i><br>OOB: 8% |               |               |               | <b>Class</b> |
|-------------------------------|---------------|---------------|---------------|--------------|
|                               | <b>spring</b> | <b>summer</b> | <b>autumn</b> | <b>Error</b> |
| spring                        | 10            | 2             | 0             | 17%          |
| summer                        | 1             | 11            | 0             | 8%           |
| autumn                        | 0             | 0             | 12            | 0%           |

| <i>Cane</i><br>OOB: 9% |               |               |               | <b>Class</b> |
|------------------------|---------------|---------------|---------------|--------------|
|                        | <b>spring</b> | <b>summer</b> | <b>autumn</b> | <b>Error</b> |
| spring                 | 9             | 0             | 2             | 18%          |
| summer                 | 1             | 11            | 0             | 8%           |
| autumn                 | 0             | 0             | 12            | 0%           |

**TABLE S3** Classification of the grapevine-associated microbiota according to the factor crown gall from performing a supervised learning analysis (Random Forest). The predicted classification of the sample sites from grapevines with and without a crown gall (horizontal) are compared to the known sample site classifications of grapevines with and without a crown gall (vertical). The percentage of wrongly classified samples of grapevines with or without a crown gall is called class error while the percentage of wrongly classified samples within one sampling site (soil, root, graft union, cane) is termed an out-of-bag error (OOB).

| <b><i>Soil</i></b><br>OOB: 40% | <b>Class</b> |                |              |
|--------------------------------|--------------|----------------|--------------|
|                                | <b>with</b>  | <b>without</b> | <b>Error</b> |
| without                        | 4            | 14             | 22%          |
| with                           | 7            | 10             | 59%          |

  

| <b><i>Root</i></b><br>OOB: 59% | <b>Class</b> |                |              |
|--------------------------------|--------------|----------------|--------------|
|                                | <b>with</b>  | <b>without</b> | <b>Error</b> |
| without                        | 10           | 7              | 59%          |
| with                           | 7            | 10             | 59%          |

  

| <b><i>Graft union</i></b><br>OOB: 8% | <b>Class</b> |                |              |
|--------------------------------------|--------------|----------------|--------------|
|                                      | <b>with</b>  | <b>without</b> | <b>Error</b> |
| without                              | 0            | 18             | 0%           |
| with                                 | 15           | 3              | 17%          |

  

| <b><i>Cane</i></b><br>OOB: 37% | <b>Class</b> |                |              |
|--------------------------------|--------------|----------------|--------------|
|                                | <b>with</b>  | <b>without</b> | <b>Error</b> |
| without                        | 7            | 11             | 39%          |
| with                           | 11           | 6              | 35%          |

**TABLE S4** Operational taxonomic units (OTUs) with significant differences (FDR < 0.001) in the mean number of 16S rRNA gene amplicon sequences. Differences between graft unions with 'A' and without 'B' crown gall disease in spring, summer, and autumn. Fold changes are given as log2FC and log2CPM (average log2 counts per million). Statistics analysis was performed using a two-sided test for calculation of the p-values. The false discovery rate (FDR) gives an adjusted p-value for multiple testing according to Benjamin-Hochberg.

| factor         | comparision (A / B) | mean sequence number |      | fold change |          | statitics |                          | bacterial classification |                    |                  |          | OTU      |
|----------------|---------------------|----------------------|------|-------------|----------|-----------|--------------------------|--------------------------|--------------------|------------------|----------|----------|
|                |                     | A                    | B    | logFC       | logCP    | p-value   | FDR                      | class                    | order              | genus            | species  |          |
| spring         | with / without      | 1191                 | 8    | 7.0         | 15.3     | 3.19E-13  | 4.71E-10                 | $\alpha$ -Proteobacteria | Rhizobiales        | Agrobacterium    | vitis    | OTU_0003 |
|                | with / without      | 4159                 | 94   | 5.4         | 17.1     | 7.06E-07  | 2.98E-04                 | $\gamma$ -Proteobacteria | Pseudomonadales    | Pseudomonas      | NA       | OTU_0005 |
|                | with / without      | 1872                 | 10   | 7.4         | 15.9     | 4.03E-13  | 5.10E-10                 | $\gamma$ -Proteobacteria | Enterobacteriales  | NA               | NA       | OTU_0008 |
|                | with / without      | 121                  | 8    | 3.7         | 12.1     | 1.65E-09  | 1.46E-06                 | $\alpha$ -Proteobacteria | Sphingomonadales   | Novosphingobium  | NA       | OTU_0022 |
|                | with / without      | 985                  | 1    | 9.1         | 15.0     | 3.27E-37  | 2.89E-33                 | $\gamma$ -Proteobacteria | Enterobacteriales  | Sodalis          | NA       | OTU_0043 |
|                | with / without      | 56                   | 5    | 3.2         | 11.1     | 1.41E-06  | 5.66E-04                 | Actinobacteria           | Actinomycetales    | Mycobacterium    | NA       | OTU_0065 |
|                | with / without      | 92                   | 0    | 6.4         | 11.7     | 1.87E-14  | 3.31E-11                 | $\gamma$ -Proteobacteria | Xanthomonadales    | Xanthomonas      | NA       | OTU_0076 |
|                | with / without      | 107                  | 2    | 5.1         | 11.9     | 3.34E-08  | 2.47E-05                 | $\alpha$ -Proteobacteria | Rhizobiales        | Bosea            | genosp.  | OTU_0180 |
|                | with / without      | 26                   | 0    | 4.4         | 10.1     | 5.79E-07  | 2.70E-04                 | $\gamma$ -Proteobacteria | Xanthomonadales    | NA               | NA       | OTU_0188 |
|                | with / without      | 45                   | 0    | 5.4         | 10.7     | 8.63E-17  | 1.91E-13                 | Flavobacteriia           | Flavobacteriales   | Flavobacterium   | NA       | OTU_0248 |
|                | with / without      | 24                   | 0    | 4.3         | 10.0     | 3.14E-07  | 1.82E-04                 | Sphingobacteriia         | Sphingobacteriales | Pedobacter       | NA       | OTU_0271 |
|                | with / without      | 24                   | 0    | 4.5         | 10.0     | 6.74E-13  | 7.46E-10                 | $\alpha$ -Proteobacteria | Rhodospirillales   | NA               | NA       | OTU_0288 |
|                | with / without      | 22                   | 0    | 4.0         | 9.9      | 2.87E-09  | 2.31E-06                 | $\alpha$ -Proteobacteria | Sphingomonadales   | Sphingomonas     | NA       | OTU_0421 |
|                | with / without      | 23                   | 1    | 3.7         | 9.9      | 4.72E-08  | 3.22E-05                 | $\alpha$ -Proteobacteria | Rhizobiales        | NA               | NA       | OTU_1129 |
|                | with / without      | 1                    | 244  | -7.2        | 13.0     | 4.03E-07  | 2.10E-04                 | $\gamma$ -Proteobacteria | Pseudomonadales    | Pseudomonas      | NA       | OTU_2368 |
|                | with / without      | 875                  | 1    | 9.1         | 14.8     | 9.27E-30  | 4.11E-26                 | $\gamma$ -Proteobacteria | NA                 | NA               | NA       | OTU_3436 |
| with / without | 523                 | 0                    | 8.7  | 14.1        | 1.78E-18 | 5.26E-15  | $\gamma$ -Proteobacteria | Enterobacteriales        | Erwinia            | NA               | OTU_7832 |          |
| with / without | 50                  | 0                    | 5.3  | 10.9        | 7.65E-08 | 4.84E-05  | Actinobacteria           | Actinomycetales          | NA                 | NA               | OTU_8550 |          |
| summer         | with / without      | 120                  | 11   | 3.3         | 12.6     | 2.71E-07  | 4.80E-04                 | $\alpha$ -Proteobacteria | Rhizobiales        | Agrobacterium    | vitis    | OTU_0003 |
|                | with / without      | 38                   | 1380 | -5.1        | 16.0     | 9.48E-08  | 4.20E-04                 | $\gamma$ -Proteobacteria | Pseudomonadales    | Pseudomonas      | NA       | OTU_0005 |
|                | with / without      | 1                    | 139  | -6.0        | 12.7     | 1.13E-09  | 1.00E-05                 | Actinobacteria           | Actinomycetales    | Curtobacterium   | NA       | OTU_0011 |
|                | with / without      | 4                    | 171  | -5.1        | 13.0     | 1.58E-07  | 4.27E-04                 | $\alpha$ -Proteobacteria | Sphingomonadales   | Sphingomonas     | NA       | OTU_0052 |
|                | with / without      | 37                   | 1    | 4.4         | 11.0     | 1.93E-07  | 4.27E-04                 | $\gamma$ -Proteobacteria | NA                 | NA               | NA       | OTU_3436 |
| autumn         | with / without      | 1230                 | 1    | 9           | 16       | 9.51E-31  | 2.10E-27                 | $\alpha$ -Proteobacteria | Rhizobiales        | Agrobacterium    | vitis    | OTU_0003 |
|                | with / without      | 1855                 | 2    | 9           | 16       | 8.13E-22  | 1.44E-18                 | $\gamma$ -Proteobacteria | Pseudomonadales    | Pseudomonas      | NA       | OTU_0005 |
|                | with / without      | 345                  | 1    | 8           | 14       | 2.18E-10  | 1.76E-07                 | $\alpha$ -Proteobacteria | Rhizobiales        | Methylobacterium | NA       | OTU_0006 |
|                | with / without      | 509                  | 11   | 5           | 14       | 1.86E-09  | 1.18E-06                 | $\beta$ -Proteobacteria  | Burkholderiales    | NA               | NA       | OTU_0007 |
|                | with / without      | 3315                 | 8    | 9           | 17       | 1.17E-13  | 1.15E-10                 | $\gamma$ -Proteobacteria | Enterobacteriales  | NA               | NA       | OTU_0008 |
|                | with / without      | 87                   | 8    | 3           | 12       | 6.55E-07  | 3.05E-04                 | $\alpha$ -Proteobacteria | Sphingomonadales   | Sphingomonas     | NA       | OTU_0013 |
|                | with / without      | 168                  | 1    | 6           | 13       | 4.01E-15  | 4.43E-12                 | $\alpha$ -Proteobacteria | Sphingomonadales   | Novosphingobium  | NA       | OTU_0022 |
|                | with / without      | 252                  | 15   | 4           | 13       | 1.06E-08  | 6.26E-06                 | $\alpha$ -Proteobacteria | Rhizobiales        | Agrobacterium    | NA       | OTU_0032 |
|                | with / without      | 352                  | 0    | 8           | 14       | 1.19E-61  | 1.05E-57                 | $\gamma$ -Proteobacteria | Enterobacteriales  | Sodalis          | NA       | OTU_0043 |
|                | with / without      | 61                   | 1    | 5           | 11       | 1.60E-47  | 7.10E-44                 | Actinobacteria           | Actinomycetales    | Mycobacterium    | NA       | OTU_0065 |
|                | with / without      | 103                  | 0    | 6           | 12       | 2.06E-15  | 2.61E-12                 | $\gamma$ -Proteobacteria | Xanthomonadales    | Xanthomonas      | NA       | OTU_0076 |
|                | with / without      | 87                   | 1    | 5           | 12       | 1.38E-06  | 6.12E-04                 | $\alpha$ -Proteobacteria | Rhizobiales        | Methylopila      | NA       | OTU_0121 |
|                | with / without      | 67                   | 1    | 5           | 11       | 1.38E-10  | 1.22E-07                 | Cytophagia               | Cytophagales       | Dyadobacter      | NA       | OTU_0144 |
|                | with / without      | 26                   | 1    | 3           | 10       | 1.84E-06  | 7.74E-04                 | Actinobacteria           | Actinomycetales    | Salinibacterium  | NA       | OTU_0210 |
|                | with / without      | 25                   | 1    | 4           | 10       | 1.21E-09  | 8.92E-07                 | $\alpha$ -Proteobacteria | Sphingomonadales   | Sphingomonas     | NA       | OTU_0421 |
|                | with / without      | 26                   | 1    | 4           | 10       | 6.62E-16  | 9.77E-13                 | $\beta$ -Proteobacteria  | Burkholderiales    | NA               | NA       | OTU_3153 |
|                | with / without      | 611                  | 1    | 8           | 15       | 4.64E-38  | 1.37E-34                 | $\gamma$ -Proteobacteria | NA                 | NA               | NA       | OTU_3436 |

```
# R script for statistical analysis of microbiota in one vineyard in
Franconia and in vitro grown grapevine plantlets
# datasource: SRA:EBI database (http://www.ebi.ac.uk/ena), project:
RJE12040
# Title: Crown galls of grapevine (Vitis vinifera) host distinct
microbiota; Authors: Hanna Faist, Alexander Keller, Ute Henschel
Humeida, Rosalia Deeken; Journal: AEM
#
```

```
#loading required packages
library(phyloseq)
library(ggplot2)
library(vegan) # version 2.2-1
library(edgeR)
library(randomForest)#4.6-10
library(plyr)
```

```
#####
```

```
#veganotu from
https://rdp.cme.msu.edu/tutorials/stats/using\_rdp\_output\_with\_phyloseq.ht
ml, 2015-12-14, John Quensen and Qiong Wang
```

```
veganotu <- function(physeq) {
  OTU <- otu_table(physeq)
  if (taxa_are_rows(OTU)) {
    OTU <- t(OTU)
  }
  OTU <- as(OTU, "matrix")
  return(OTU)
}
####
```

```
# Phyloseq to EdgeR from http://joey711.github.io/phyloseq-extensions/edgeR.html, 2015-12-14
```

```
#####
```

```
## Convert phyloseq OTU count data into DGEList for edgeR package
```

```
##
```

```
##
```

```
## Further details.
```

```
##
```

```
## @param physeq (Required). A \link{phyloseq-class} or
```

```
## an \link{otu_table-class} object.
```

```
## The latter is only appropriate if group argument is also a
```

```
## vector or factor with length equal to nsamples(physeq).
```

```
##
```

```
## @param group (Required). A character vector or factor giving the
experimental
```

```
## group/condition for each sample/library. Alternatively, you may
provide
```

```

#' the name of a sample variable. This name should be among the output
of
#' \code{sample_variables(physeq)}, in which case
#' \code{get_variable(physeq, group)} would return either a character
vector or factor.
#' This is passed on to \code{\link[edgeR]{DGEList}},
#' and you may find further details or examples in its documentation.
#'
#' @param method (Optional). The label of the edgeR-implemented
normalization to use.
#' See \code{\link[edgeR]{calcNormFactors}} for supported options and
details.
#' The default option is \code{"RLE"}, which is a scaling factor method
#' proposed by Anders and Huber (2010).
#' At time of writing, the \link[edgeR]{edgeR} package supported
#' the following options to the \code{method} argument:
#'
#' \code{c("TMM", "RLE", "upperquartile", "none")}.
#'
#' @param ... Additional arguments passed on to
\code{\link[edgeR]{DGEList}}
#'
#' @examples
#'
phyloseq_to_edgeR = function(physeq, group, method="RLE", ...){
  require("edgeR")
  require("phyloseq")
  # Enforce orientation.
  if( !taxa_are_rows(physeq) ){ physeq <- t(physeq) }
  x = as(otu_table(physeq), "matrix")
  # Add one to protect against overflow, log(0) issues.
  x = x + 1
  # Check `group` argument
  if( identical(all.equal(length(group), 1), TRUE) & nsamples(physeq) > 1
) {
    # Assume that group was a sample variable name (must be categorical)
    group = get_variable(physeq, group)
  }
  # Define gene annotations (`genes`) as tax_table
  taxonomy = tax_table(physeq, errorIfNULL=FALSE)
  if( !is.null(taxonomy) ){
    taxonomy = data.frame(as(taxonomy, "matrix"))
  }
  # Now turn into a DGEList
  y = DGEList(counts=x, group=group, genes=taxonomy, remove.zeros = TRUE,
...)
  # Calculate the normalization factors
  z = calcNormFactors(y, method=method)
  # Check for division by zero inside `calcNormFactors`
  if( !all(is.finite(z$samples$norm.factors)) ){
    stop("Something wrong with edgeR::calcNormFactors on this data,
non-finite $norm.factors, consider changing `method` argument")
  }
  # Estimate dispersions
  return(estimateTagwiseDisp(estimateCommonDisp(z)))
}
#####
#####

```

```

#funktion to make multiple plots from http://www.cookbook-
r.com/Graphs/Multiple_graphs_on_one_page_%28ggplot2%29/, 2015-12-15
#####
# Multiple plot function
#
# ggplot objects can be passed in ..., or to plotlist (as a list of
ggplot objects)
# - cols:   Number of columns in layout
# - layout: A matrix specifying the layout. If present, 'cols' is
ignored.
#
# If the layout is something like matrix(c(1,2,3,3), nrow=2, byrow=TRUE),
# then plot 1 will go in the upper left, 2 will go in the upper right,
and
# 3 will go all the way across the bottom.
#
multiplot <- function(..., plotlist=NULL, file, cols=1, layout=NULL) {
  require(grid)

  # Make a list from the ... arguments and plotlist
  plots <- c(list(...), plotlist)

  numPlots = length(plots)

  # If layout is NULL, then use 'cols' to determine layout
  if (is.null(layout)) {
    # Make the panel
    # ncol: Number of columns of plots
    # nrow: Number of rows needed, calculated from # of cols
    layout <- matrix(seq(1, cols * ceiling(numPlots/cols)),
                      ncol = cols, nrow = ceiling(numPlots/cols))
  }

  if (numPlots==1) {
    print(plots[[1]])
  } else {
    # Set up the page
    grid.newpage()
    pushViewport(viewport(layout = grid.layout(nrow(layout),
ncol(layout))))

    # Make each plot, in the correct location
    for (i in 1:numPlots) {
      # Get the i,j matrix positions of the regions that contain this
subplot
      matchidx <- as.data.frame(which(layout == i, arr.ind = TRUE))

      print(plots[[i]], vp = viewport(layout.pos.row = matchidx$row,
layout.pos.col = matchidx$col))
    }
  }
}
#####
#####

##set local directions

```



```

treefile="<PATH-TO-DATA>\\otus.tre"
otufile="<PATH-TO-DATA>\\otus.ncmt.biom"
mapfile="<PATH-TO-DATA>\\mapfile-vers1.txt"

#otufile2 was not filtered for plastids and mitochondria
otufile2="<PATH-TO-DATA>\\otus.tax.biom"

##import data

otu= import_biom(otufile, parseFunction= parse_taxonomy_greenegenes)
map = import_qiime_sample_data(mapfile)
tree=read_tree(treefile)
datensatz=merge_phyloseq(otu, map, tree)

#without filtering for plastids and chloroplasts
otu2= import_biom(otufile2, parseFunction= parse_taxonomy_greenegenes)
datensatz2=merge_phyloseq(otu2, map, tree)

## generate a sub dataset with in vitro grown grapevine plantlets

BlankIVS= subset_samples(datensatz, (sample_data(datensatz))$Study ==
"seasons-invitro" )
Invitro1= subset_samples(datensatz, (sample_data(datensatz))$Study ==
"invitro" )
Invitro=merge_phyloseq(BlankIVS, Invitro1)
Invitro= subset_samples(Invitro, (sample_data(Invitro))$grapevariety !=
"silvaner" ) #silvaner was not used for the study as A.vitis sequences
were found in this variety of in vitro grapevine plantlets

GV=subset_samples(Invitro, (sample_data(Invitro))$Crown_gall == "GV3101" )
S7=subset_samples(Invitro, (sample_data(Invitro))$Crown_gall == "A.vitis"
)
no=subset_samples(Invitro, (sample_data(Invitro))$Crown_gall == "no" )

Invitro_18=merge_phyloseq(GV,S7,no)

## generate sub datasets with grapevine and soil samples from the
vineyard

Seasons1= subset_samples(datensatz, (sample_data(datensatz))$Study ==
"seasons")
Seasons1= subset_samples(Seasons1, (sample_data(Seasons1))$Season !=
"graftgall") # exclude grapevine samples which are not a part of the
publication as they are not from the same vineyard
BlankIVS= subset_samples(datensatz, (sample_data(datensatz))$Study ==
"seasons-invitro" )
Seasonsdatab1=merge_phyloseq(Seasons1, BlankIVS)
Seasonsdata_c1=subset_samples(Seasonsdatab1,
(sample_data(Seasonsdatab1))$Crown_gall != "blank") #exclude negative
controls (c1) without any material
Seasonsdata_c2=subset_samples(Seasonsdata_c1,
sample_data(Seasonsdata_c1)$Kit == "MP") # exclude soil samples done with
another dna-extraction kit (c2)
Seasonsdata_144= subset_samples(Seasonsdata_c2, X.SampleID!="HF055") #One
DNA-extraction was analyzed on two different sequencing chips, the second
sample was excluded - now 144 samples as deccribed in FIG_1C remain

```

```

# remove outliers
Seasonsdata = subset_samples(Seasonsdata_144, X.SampleID!="HF009")
Seasonsdata = subset_samples(Seasonsdata, X.SampleID!="HF060")
Seasonsdata = subset_samples(Seasonsdata, X.SampleID!="HF096")
Seasonsdata = subset_samples(Seasonsdata, X.SampleID!="HF140")

# separate data according to sources
Trunkdata=subset_samples(Seasonsdata, (sample_data(Seasonsdata))$Source == "trunk")
Canedata=subset_samples(Seasonsdata, (sample_data(Seasonsdata))$Source == "cane")
Rootdata=subset_samples(Seasonsdata, (sample_data(Seasonsdata))$Source == "root")
Soildata=subset_samples(Seasonsdata, (sample_data(Seasonsdata))$Source == "soil")

# restrict to graft union samples and separate them according to crown gall disease and seasons
# GU= graftunion, CG=crown_gall, NGGU=Non-galled graft union, Au=autumn, Sp=spring, Su=summer

GU_data=Trunkdata
CG_data=subset_samples(GU_data, (sample_data(GU_data))$Crown_gall == "present")
NGGU_data=subset_samples(GU_data, (sample_data(GU_data))$Crown_gall == "absent")

Au_data=subset_samples(GU_data, (sample_data(GU_data))$Seasons == "autumn")
Sp_data=subset_samples(GU_data, (sample_data(GU_data))$Seasons == "spring")
Su_data=subset_samples(GU_data, (sample_data(GU_data))$Seasons == "summer")

NGGU_Au_data=subset_samples(NGGU_data, (sample_data(NGGU_data))$Seasons == "autumn")
NGGU_Sp_data=subset_samples(NGGU_data, (sample_data(NGGU_data))$Seasons == "spring")
NGGU_Su_data=subset_samples(NGGU_data, (sample_data(NGGU_data))$Seasons == "summer")

CG_Au_data=subset_samples(CG_data, (sample_data(CG_data))$Seasons == "autumn")
CG_Sp_data=subset_samples(CG_data, (sample_data(CG_data))$Seasons == "spring")
CG_Su_data=subset_samples(CG_data, (sample_data(CG_data))$Seasons == "summer")

CG_AuSp_data=merge_phyloseq(CG_Au_data, CG_Sp_data)
CG_AuSu_data=merge_phyloseq(CG_Au_data, CG_Su_data)
CG_SuSp_data=merge_phyloseq(CG_Su_data, CG_Sp_data)

NGGU_AuSp_data=merge_phyloseq(NGGU_Au_data, NGGU_Sp_data)
NGGU_AuSu_data=merge_phyloseq(NGGU_Au_data, NGGU_Su_data)
NGGU_SuSp_data=merge_phyloseq(NGGU_Su_data, NGGU_Sp_data)

```

```
#### Results in the order of the paper
```

```
## Comparison of the environmental grapevine datasets with and  
without filtering for plastids and mitochondria
```

```
#dataset with plastids and mitochondria
```

```
Seasons1_2= subset_samples(datensatz2,(sample_data(datensatz2))$Study ==  
"seasons")
```

```
Seasons1_2= subset_samples(Seasons1_2, (sample_data(Seasons1_2))$Season  
!= "graftgall") #exclude grapevine samples which are not a part of the  
publication as they are not from the same vineyard
```

```
BlankIVS_2= subset_samples(datensatz2,(sample_data(datensatz2))$Study ==  
"seasons- invitro" )
```

```
Seasonsdatabl_2=merge_phyloseq(Seasons1_2, BlankIVS_2)
```

```
Seasonsdata_c1_2=subset_samples(Seasonsdatabl_2,  
(sample_data(Seasonsdatabl_2))$Crown_gall != "blank") #exclude  
negative controls (c1) without any material
```

```
Seasonsdata_c2_2=subset_samples(Seasonsdata_c1_2,  
sample_data(Seasonsdata_c1_2)$Kit == "MP") #exclude soil samples done  
with another dna-extraction kit (c2)
```

```
Seasonsdata_144_2= subset_samples(Seasonsdata_c2_2, X.SampleID!="HF055")  
#One DNA-extraction was analyzed on two different sequencing chips,  
the second sample was excluded - now 144 samples as decribed in FIG_1C  
remain
```

```
sum(otu_table(Seasonsdata_144_2)) #total sequences with plastids and  
mitochondria
```

```
sum(otu_table(Seasonsdata_144)) #total sequences without plastids and  
mitochondria
```

```
Seasonsdata_144_gr0= prune_taxa(taxa_sums(Seasonsdata_144)>0,  
Seasonsdata_144) #remove taxa with no sequences in this dataset
```

```
## FIG 2A: Non metric multidimensional scaling analysis using the  
Bray Curtis distance to show differences between microbiomes of grapevine  
and soil material
```

```
# calculate non metric multidimensional (NMDS) scaling  
NSe=ordinate(Seasonsdata, "NMDS", distance="bray")
```

```
# plot NMDS
```

```
NMDS_Source= plot_ordination(Seasonsdata, NSe, axes=c(1,2),  
color="Source") +geom_point(size =7)+ theme_classic()  
NMDS_Source
```

```
# environmental fit for finding significant factors that influence the  
data
```

```
envfit(NSe, data.frame(sample_data(Seasonsdata)[,c(5,7,11)]))
```

```
#final layout was done with inkscape 0.91
```

```

## Analysing the influence of the factor season on the microbiome:
general linear model and anova

#extract scores of NMDS and link them to sample sheet
df=cbind(scores(NSe),data.frame(sample_data(Seasonsdata)[,c(6,5,7,11)]))

#calculate the general lineal model and show the summary results
summary(glm(NMDS1~Source,data=df))

#test the significance of the model by anova
anova(glm(NMDS1~Source,data=df), test="F")

## STAB 1: Random forest categorisation of all samples according to
different sources

Seasonsdata_rel = transform_sample_counts(Seasonsdata, function(x)
x/sum(x))

RFSource_rel= randomForest(x = veganotu(Seasonsdata_rel), y =
data.frame(sample_data(Seasonsdata_rel))$Source, ntree = 2000, mtry =
sqrt(ntaxa(Seasonsdata_rel)), importance = T, do.trace = 100)

RFSource_rel #print details

#the table layout was done in excel

## FIG 3A Richness of different sources

#Observed=Richness
SeasonsObserved.biodiv=plot_richness(Seasonsdata , x="Source", measures
= c("Observed"), title="Richness")

#plot biodiversity
SeasonsObserved.biodiv + geom_boxplot(alpha = 1)+ theme_classic()+
scale_x_discrete(limits=c("soil", "root", "trunk", "cane"))

#table with Observed values
SeasonsObserved.tab= cbind(estimate_richness(Seasonsdata,
measures=c("Observed")), sample_data(Seasonsdata))

#mean and sd per source
ddply(SeasonsObserved.tab, .(Source), summarize, mean_value =
mean(Observed)) # mean per source
ddply(SeasonsObserved.tab, .(Source), summarize, sd_value = sd(Observed))
# sd per source

#significance by wilcoxon
wilcox.test(Observed~Source, data=SeasonsObserved.tab, subset= Source
%in% c("soil", "root"))
wilcox.test(Observed~Source, data=SeasonsObserved.tab, subset= Source
%in% c("soil", "trunk"))
wilcox.test(Observed~Source, data=SeasonsObserved.tab, subset= Source
%in% c("soil", "cane"))
wilcox.test(Observed~Source, data=SeasonsObserved.tab, subset= Source
%in% c("cane", "root"))

```

```

wilcox.test(Observed~Source, data=SeasonsObserved.tab, subset= Source
%in% c("cane", "trunk"))
wilcox.test(Observed~Source, data=SeasonsObserved.tab, subset= Source
%in% c("root", "trunk"))

    ## Percentage of shared OTUs of different sample sources

#extract the rownames of those OTUs with at least one sequence
source.venn=rownames(otu_table(Seasonsdata))[rowSums(otu_table(Seasonsdat
a))>0.01]
trunk.venn=rownames(otu_table(Trunkdata))[rowSums(otu_table(Trunkdata))>0
.01]
root.venn=rownames(otu_table(Rootdata))[rowSums(otu_table(Rootdata))>0.01
]
soil.venn=rownames(otu_table(Soildata))[rowSums(otu_table(Soildata))>0.01
]
cane.venn=rownames(otu_table(Canedata))[rowSums(otu_table(Canedata))>0.01
]

#percentage of shared OTUs between all sources
venn_list.source= list(Soil=soil.venn, Root=root.venn, Trunk=trunk.venn,
Cane=cane.venn)
p=(length(Reduce(intersect, venn_list.source))/length(source.venn))*100

#percentage of shared OTUs of one source with the soil (the OTUs of the
non-soil source are=100%)
length(intersect(soil.venn,root.venn))/(length(root.venn))
length(intersect(cane.venn,soil.venn))/(length(cane.venn))
length(intersect(trunk.venn,soil.venn))/(length(trunk.venn))

#percentage of shared OTUS between two sources (unique OTUs in both
sources are =100%)
length(intersect(soil.venn,root.venn))/(length(setdiff(soil.venn,
root.venn))+ length(setdiff(root.venn,
soil.venn))+length(intersect(soil.venn,root.venn)))
length(intersect(trunk.venn,root.venn))/(length(setdiff(trunk.venn,
root.venn))+length(setdiff(root.venn,
trunk.venn))+length(intersect(trunk.venn,root.venn)))
length(intersect(trunk.venn,cane.venn))/(length(setdiff(trunk.venn,
cane.venn))+length(setdiff(cane.venn,
trunk.venn))+length(intersect(trunk.venn,cane.venn)))
length(intersect(cane.venn,soil.venn))/(length(setdiff(cane.venn,
soil.venn))+length(setdiff(soil.venn,
cane.venn))+length(intersect(soil.venn,cane.venn)))
length(intersect(trunk.venn,soil.venn))/(length(setdiff(trunk.venn,
soil.venn))+length(setdiff(soil.venn,
trunk.venn))+length(intersect(soil.venn,trunk.venn)))
length(intersect(cane.venn,root.venn))/(length(setdiff(cane.venn,
root.venn))+length(setdiff(root.venn,
cane.venn))+length(intersect(root.venn,cane.venn)))

    ## FIG 3B alpha Diversity (Shannon) of different sources

#alpha diversity, Shannon Index
SeasonsShannon.biodiv=plot_richness(Seasonsdata , x="Source", measures =
c("Shannon"), title="Shannon")

```

```

#plot biodiversity
SeasonsShannon.biodiv + geom_boxplot(alpha = 1)+ theme_classic()+
scale_x_discrete(limits=c("soil", "root", "trunk", "cane"))

#Table with Shannon values
SeasonsShannon.tab= cbind(estimate_richness(Seasonsdata,
measures=c("Shannon")), sample_data(Seasonsdata))

#mean and sd per source
ddply(SeasonsShannon.tab, .(Source), summarize, mean_value =
mean(Shannon) # mean per source
ddply(SeasonsShannon.tab, .(Source), summarize, sd_value = sd(Shannon))
# sd per source

#significance by wilcoxon
wilcox.test(Shannon~Source, data=SeasonsShannon.tab, subset= Source %in%
c("soil", "root"))
wilcox.test(Shannon~Source, data=SeasonsShannon.tab, subset= Source %in%
c("soil", "trunk"))
wilcox.test(Shannon~Source, data=SeasonsShannon.tab, subset= Source %in%
c("soil", "cane"))
wilcox.test(Shannon~Source, data=SeasonsShannon.tab, subset= Source %in%
c("cane", "root"))
wilcox.test(Shannon~Source, data=SeasonsShannon.tab, subset= Source %in%
c("root", "trunk"))

## FIG 3C: Relative phyla composition of microbiota of soil, root,
graft union and canes

#merge all OTUs from the same phyla within one sample
PhylSeasons=tax_glom(Seasonsdata, taxrank="Phylum")
#now we have instead of OTUs, different phyla-names

#merge all samples from the same source
PhylSeasons.M=merge_samples(PhylSeasons, "Source")

#calculate the relative abundance of each phylum in each sample type
PhylSeasons.Mrel=transform_sample_counts(PhylSeasons.M, function(x)
x/sum(x))

#merge all phyla with a relative abundance < 0.05
PhylSeasons.plot=merge_taxa(PhylSeasons.Mrel,
taxa_names(PhylSeasons.Mrel)[taxa_sums(PhylSeasons.Mrel)<0.05])

#create table
TablePhylSeasons=rbind(otu_table(PhylSeasons.plot),t(tax_table(PhylSeasons.plot)[,2]))

#save files

#write.table(TablePhylSeasons, "<PATH-TO-DATA>\\TablePhylSeasons")
# the layout of the barplot was done in excel

## FIG 3D: Relative genera composition of microbiota of soil, root,
graft union and cane

```

```

#merge all OTUs from the same genus within one sample
GenusSeasons=tax_glom(Seasonsdata, taxrank="Genus")
#now we have instead of OTUs, different Genera-names

#merge all samples from the same source
GenusSeasons.M=merge_samples(GenusSeasons, "Source")

#calculate the relative abundance of each genus in each sample type
GenusSeasons.Mrel=transform_sample_counts(GenusSeasons.M, function(x)
x/sum(x))

#merge all genera with a relative abundance < 0.05
GenusSeasons.plot=merge_taxa(GenusSeasons.Mrel,
taxa_names(GenusSeasons.Mrel)[taxa_sums(GenusSeasons.Mrel)<0.05])

#create table
TableGenusSeasons=rbind(otu_table(GenusSeasons.plot),t(tax_table(GenusSea
sons.plot)[,6]))

#save files
#write.table(TableGenusSeasons, "<PATH-TO-DATA>\\TableGenusSeasons")
# the layout of the barplot was done in excel

```

## FIG 4: NMDS separated for each source and coloured according to crown gall disease and seasons

```

# calculate non metric multidimensional (NMDS) scaling plot
NC=ordinate(Canedata, "NMDS", distance="bray")
NR=ordinate(Rootdata, "NMDS", distance="bray")
NS=ordinate(Soildata, "NMDS", distance="bray")
NT=ordinate(Trunkdata, "NMDS", distance="bray")

# plot NMDS
FIG4BS= plot_ordination(Soildata, NS, axes=c(1,2), shape="Crown_gall",
title="soil" ) +geom_point(size =4)+
theme_classic()+scale_shape_manual(values=c(17,15))+coord_cartesian(xlim
= c(-2, 2), ylim = c(-1.1,1))
FIG4BR= plot_ordination(Rootdata, NR, axes=c(1,2), shape="Crown_gall",
title="root" ) +geom_point(size =4)+
theme_classic()+scale_shape_manual(values=c(17,15))+coord_cartesian(xlim
= c(-2, 2), ylim = c(-1.1,1))
FIG4BT= plot_ordination(Trunkdata, NT, axes=c(1,2), shape="Crown_gall",
title="graft union" ) +geom_point(size =4)+
theme_classic()+scale_shape_manual(values=c(17,15))+coord_cartesian(xlim
= c(-2, 2), ylim = c(-1.1,1))
FIG4BC= plot_ordination(Canedata, NC, axes=c(1,2), shape="Crown_gall",
title="cane" ) +geom_point(size =4)+
theme_classic()+scale_shape_manual(values=c(17,15))+coord_cartesian(xlim
= c(-2, 2), ylim = c(-1.1,1))

FIG4AS= plot_ordination(Soildata, NS, axes=c(1,2), color="Seasons",
title="soil" ) +geom_point(size =4)+
theme_classic()+scale_shape_manual(values=c(17,15))+coord_cartesian(xlim
= c(-2, 2), ylim = c(-1.1,1))
FIG4AR= plot_ordination(Rootdata, NR, axes=c(1,2), color="Seasons",
title="root" ) +geom_point(size =4)+

```

```

theme_classic()+scale_shape_manual(values=c(17,15))+coord_cartesian(xlim
= c(-2, 2), ylim = c(-1.1,1))
FIG4AT= plot_ordination(Trunkdata, NT, axes=c(1,2),color="Seasons",
title="graft union" ) +geom_point(size =4)+
theme_classic()+scale_shape_manual(values=c(17,15))+coord_cartesian(xlim
= c(-2, 2), ylim = c(-1.1,1))
FIG4AC= plot_ordination(Canedata, NC, axes=c(1,2), color="Seasons",
title="cane" ) +geom_point(size =4)+
theme_classic()+scale_shape_manual(values=c(17,15))+coord_cartesian(xlim
= c(-2, 2), ylim = c(-1.1,1))

```

```

multiplot(FIG4BS,FIG4BT,FIG4BR,FIG4BC, cols=2)
multiplot(FIG4AS,FIG4AT,FIG4AR,FIG4AC, cols=2)

```

```

# environmental fit for finding significant factors that influence the
data

```

```

envfit(NT, data.frame(sample_data(Trunkdata)[,c(7,11)]))
envfit(NC, data.frame(sample_data(Canedata)[,c(7,11)]))
envfit(NR, data.frame(sample_data(Rootdata)[,c(7,11)]))
envfit(NS, data.frame(sample_data(Soildata)[,c(7,11)]))

```

```

#the final layout of the multiplots was done in inkscape 0.91

```

```

##STAB 2: Random forest categorisation of graft union samples
according to different seasons

```

```

Trunkdata_rel = transform_sample_counts(Trunkdata, function(x) x/sum(x))
Soildata_rel = transform_sample_counts(Soildata, function(x) x/sum(x))
Rootdata_rel = transform_sample_counts(Rootdata, function(x) x/sum(x))
Canedata_rel = transform_sample_counts(Canedata, function(x) x/sum(x))

```

```

RF_Tr_Se_rel= randomForest(x = veganotu(Trunkdata_rel), y =
data.frame(sample_data(Trunkdata_rel))$Seasons, ntree = 2000, mtry =
sqrt(ntaxa(Trunkdata_rel)), importance = T, do.trace = 100)
RF_So_Se_rel= randomForest(x = veganotu(Soildata_rel), y =
data.frame(sample_data(Soildata_rel))$Seasons, ntree = 2000, mtry =
sqrt(ntaxa(Soildata_rel)), importance = T, do.trace = 100)
RF_Ca_Se_rel= randomForest(x = veganotu(Canedata_rel), y =
data.frame(sample_data(Canedata_rel))$Seasons, ntree = 2000, mtry =
sqrt(ntaxa(Canedata_rel)), importance = T, do.trace = 100)
RF_Ro_Se_rel= randomForest(x = veganotu(Rootdata_rel), y =
data.frame(sample_data(Rootdata_rel))$Seasons, ntree = 2000, mtry =
sqrt(ntaxa(Rootdata_rel)), importance = T, do.trace = 100)

```

```

RF_Ro_Se_rel
RF_So_Se_rel
RF_Ca_Se_rel
RF_Tr_Se_rel #print details

```

```

#the table layout was done in excel

```

```

##STAB 3: Random forest categorisation of graft union samples
according to the crown gall disease

```

```

Trunkdata_rel = transform_sample_counts(Trunkdata, function(x) x/sum(x))
Soildata_rel = transform_sample_counts(Soildata, function(x) x/sum(x))

```



```

Rootdata_rel = transform_sample_counts(Rootdata, function(x) x/sum(x))
Canedata_rel = transform_sample_counts(Canedata, function(x) x/sum(x))

RF_Tr_CG_rel= randomForest(x = veganotu(Trunkdata_rel), y =
data.frame(sample_data(Trunkdata_rel))$Crown_gall, ntree = 2000, mtry =
sqrt(ntaxa(Trunkdata_rel)), importance = T, do.trace = 100)
RF_So_CG_rel= randomForest(x = veganotu(Soildata_rel), y =
data.frame(sample_data(Soildata_rel))$Crown_gall, ntree = 2000, mtry =
sqrt(ntaxa(Soildata_rel)), importance = T, do.trace = 100)
RF_Ca_CG_rel= randomForest(x = veganotu(Canedata_rel), y =
data.frame(sample_data(Canedata_rel))$Crown_gall, ntree = 2000, mtry =
sqrt(ntaxa(Canedata_rel)), importance = T, do.trace = 100)
RF_Ro_CG_rel= randomForest(x = veganotu(Rootdata_rel), y =
data.frame(sample_data(Rootdata_rel))$Crown_gall, ntree = 2000, mtry =
sqrt(ntaxa(Rootdata_rel)), importance = T, do.trace = 100)

RF_Ro_CG_rel
RF_Ca_CG_rel
RF_So_CG_rel
RF_Tr_CG_rel #print details

#the table layout was done in excel

##FIG 5A: Richness in graft union samples

#Observed=Richness
GU_Observed.biodiv=plot_richness(GU_data, color="Crown_gall" ,
x="Seasons", measures = "Observed", title="GU")

#plot biodiversity
GU_Observed.biodiv + geom_boxplot(alpha = 1)+ theme_classic()+
scale_x_discrete(limits=c("spring", "summer", "autumn"))+
scale_colour_manual(values = c("blue", "red"))

#Table with Observed values
CG_Observed.tab= cbind(estimate_richness(CG_data,
measures=c("Observed")), sample_data(CG_data))
NGGU_Observed.tab= cbind(estimate_richness(NGGU_data,
measures=c("Observed")), sample_data(NGGU_data))
Au_Observed.tab= cbind(estimate_richness(Au_data,
measures=c("Observed")), sample_data(Au_data))
Sp_Observed.tab= cbind(estimate_richness(Sp_data,
measures=c("Observed")), sample_data(Sp_data))
Su_Observed.tab= cbind(estimate_richness(Su_data,
measures=c("Observed")), sample_data(Su_data))

#significance by wilcoxon
wilcox.test(Observed~Seasons, data=NGGU_Observed.tab, subset= Seasons
%in% c("summer", "autumn"))
wilcox.test(Observed~Seasons, data=NGGU_Observed.tab, subset= Seasons
%in% c("autumn", "spring"))
wilcox.test(Observed~Crown_gall, data=Au_Observed.tab)
wilcox.test(Observed~Crown_gall, data=Su_Observed.tab)
wilcox.test(Observed~Crown_gall, data=Sp_Observed.tab)

```

```

## FIG 5 B: Shannon index in galled and non-galled graft unions

#biodiversity
GU_Shannon.biodiv=plot_richness(GU_data, color="Crown_gall" ,
x="Seasons", measures = "Shannon", title="GU")

#plot biodiversity
GU_Shannon.biodiv + geom_boxplot(alpha = 1)+ theme_classic()+
scale_x_discrete(limits=c("spring","summer","autumn"))+
scale_colour_manual(values = c("blue","red"))

#Table with Shannon values
CG_Shannon.tab= cbind(estimate_richness(CG_data, measures=c("Shannon")),
sample_data(CG_data))
NGGU_Shannon.tab= cbind(estimate_richness(NGGU_data,
measures=c("Shannon")), sample_data(NGGU_data))
Au_Shannon.tab= cbind(estimate_richness(Au_data, measures=c("Shannon")),
sample_data(Au_data))
Sp_Shannon.tab= cbind(estimate_richness(Sp_data, measures=c("Shannon")),
sample_data(Sp_data))
Su_Shannon.tab= cbind(estimate_richness(Su_data, measures=c("Shannon")),
sample_data(Su_data))

#significance by wilcoxon
wilcox.test(Shannon~Seasons, data=CG_Shannon.tab, subset= Seasons %in%
c("summer", "autumn"))
wilcox.test(Shannon~Seasons, data=CG_Shannon.tab, subset= Seasons %in%
c("summer", "spring"))
wilcox.test(Shannon~Crown_gall, data=Au_Shannon.tab)
wilcox.test(Shannon~Crown_gall, data=Su_Shannon.tab)
wilcox.test(Shannon~Crown_gall, data=Sp_Shannon.tab)

## FIG 5 C, Three most abundant OTUs in the six different graft
union types (sp-cg, su-cg, au-cg, sp-nggu, su-nggu, au-nggu)

# merge all crown gall samples from the same season
CG.M=merge_samples(CG_data, "Seasons")
NGGU.M=merge_samples(NGGU_data, "Seasons")

# rel
CG.Mrel=transform_sample_counts(CG.M, function(x) x/sum(x))
NGGU.Mrel=transform_sample_counts(NGGU.M, function(x) x/sum(x))

# order
CG_top_OTUs=t(otu_table(CG.Mrel))[order (t(otu_table(CG.Mrel))[,1],
decreasing="TRUE"),]
NGGU_top_OTUs=t(otu_table(NGGU.Mrel))[order (t(otu_table(NGGU.Mrel))[,1],
decreasing="TRUE"),]

#write table
#write.table(CG_top_OTUs, "<PATH-TO-DATA>\\CG-top-OTUs-percent")
#write.table(NGGU_top_OTUs, "<PATH-TO-DATA>\\NGGU-top-OTUs-percent")

#barplots were done in excel

```

## STAB 4: Different abundant OTUs in spring crown galls compared to spring non-galled graft unions. The analysis was repeated for summer and autumn

```
#convert phyloseq format to EdgeR format
A.EdgeRTrunk= phyloseq_to_edgeR(Au_data, group="Crown_gall")
Sp.EdgeRTrunk= phyloseq_to_edgeR(Sp_data, group="Crown_gall")
Su.EdgeRTrunk= phyloseq_to_edgeR(Su_data, group="Crown_gall")

# Perform binary test: logFC, logCPM and p-value of the comparison of the
two groups
A.et = exactTest(A.EdgeRTrunk)
Sp.et = exactTest(Sp.EdgeRTrunk)
Su.et = exactTest(Su.EdgeRTrunk)

#create table with taxonomic rank, logFC, logCPM, P-value and FDR, sorted
by p-value
A.tt = topTags(A.et, n=nrow(A.EdgeRTrunk$table), adjust.method="BH",
sort.by="PValue")
Sp.tt = topTags(Sp.et, n=nrow(Sp.EdgeRTrunk$table), adjust.method="BH",
sort.by="PValue")
Su.tt = topTags(Su.et, n=nrow(Su.EdgeRTrunk$table), adjust.method="BH",
sort.by="PValue")
A.res = A.tt@.Data[[1]]
Sp.res = Sp.tt@.Data[[1]]
Su.res = Su.tt@.Data[[1]]

# set significant threshold
alpha = 0.001

#limit table to OTUs with FDR<treshold
A.sigtab = A.res[(A.res$FDR < alpha), ]
Sp.sigtab = Sp.res[(Sp.res$FDR < alpha), ]
Su.sigtab = Su.res[(Su.res$FDR < alpha), ]

# calculate the average abundance of sequences from the significant OTUs
per sample in each group
abNGGUSusig=apply(otu_table(NGGU_Su_data)[rownames(Su.sigtab),], 1 ,
mean)
abNGGUSpsig=apply(otu_table(NGGU_Sp_data)[rownames(Sp.sigtab),], 1 ,
mean)
abNGGUAsig=apply(otu_table(NGGU_Au_data)[rownames(A.sigtab),], 1 , mean)
abCGSsusig=apply(otu_table(CG_Su_data)[rownames(Su.sigtab),], 1 , mean)
abCGSpsig=apply(otu_table(CG_Sp_data)[rownames(Sp.sigtab),], 1 , mean)
abCGAsig=apply(otu_table(CG_Au_data)[rownames(A.sigtab),], 1 , mean)

#save files
#write.table(A.sigtab, "<PATH-TO-DATA>\\A.sigtab")
#write.table(Sp.sigtab, "<PATH-TO-DATA>\\Sp.sigtab")
#write.table(Su.sigtab, "<PATH-TO-DATA>\\Su.sigtab")
#write.table(abNGGUSusig, "<PATH-TO-DATA>\\abNGGUSusig")
#write.table(abNGGUSpsig, "<PATH-TO-DATA>\\abNGGUSpsig")
#write.table(abNGGUAsig, "<PATH-TO-DATA>\\abNGGUAsig")
#write.table(abCGSsusig, "<PATH-TO-DATA>\\abCGSsusig")
#write.table(abCGSpsig, "<PATH-TO-DATA>\\abCGSpsig")
#write.table(abCGAsig, "<PATH-TO-DATA>\\abCGAsig")

# final table layout was done in excel
```

```
## core microbiota of graft unions with and without a crown gall, a
core OTU has at least 20 sequences in at least 80% of all samples of one
group
```

```
CG_coredata=filter_taxa(CG_data, function(x) sum(x > 19) >
(0.8*length(x)), TRUE)
NGGU_coredata=filter_taxa(NGGU_data, function(x) sum(x > 19) >
(0.8*length(x)), TRUE) # no core microbiota
```

```
otu_table(CG_coredata)
tax_table(CG_coredata)
```

```
## Comparison of the invitro grapevine datasets with and without
filtering for plastids and mitochondria
```

```
BlankIVS_2= subset_samples(datensatz2, (sample_data(datensatz2))$Study ==
"seasons-invintro" )
Invitro1_2= subset_samples(datensatz2, (sample_data(datensatz2))$Study ==
"invintro" )
Invitro_2=merge_phyloseq(BlankIVS_2, Invitro1_2)
Invitro_2= subset_samples(Invitro_2, (sample_data(Invitro_2))$grapevariety
!= "silvaner" ) #silvaner was not used for the study as A.vitis sequences
were found in this variety of in vitro grapevine plantlets
GV_2=subset_samples(Invitro_2, (sample_data(Invitro_2))$Crown_gall ==
"GV3101" )
S7_2=subset_samples(Invitro_2, (sample_data(Invitro_2))$Crown_gall ==
"A.vitis" )
no_2=subset_samples(Invitro_2, (sample_data(Invitro_2))$Crown_gall == "no"
)
Invitro_18_2=merge_phyloseq(GV_2,S7_2,no_2)

sum(otu_table(Invitro_18_2) # with plastids and mitochondria
sum(otu_table(Invitro_18)) #without plastids and mitochondria

Invitro_18_gr0= prune_taxa(taxa_sums(Invitro_18)>0, Invitro_18)
#remove taxa with no sequences in this dataset
```

```
## Detected OTUs of in vitro cultivated grapevine plantlets

# calculate the average number of sequences for each OTU per sample
meanno1=apply(otu_table(no), 1, mean)

#connect to taxonomic information
meanno=cbind(tax_table(no),meanno1)
meanno[ order(meanno[,9]),]

#save table
#write.table(meanno, "<PATH-TO-DATA>\\meanno")
```

```

##TAB 1: Different abundant OTUS of in vitro grown grapevine
plantlets treated with S7(A.vitis--> crown gall growth) or GV3101 (non-
virulent A.tume--> wound)

#convert phyloseq format to EdgeR format
IVER=phyloseq_to_edgeR(Invitro, group="Crown_gall")
# Perform binary test: logFC,logCMP and p-value of the comparison of the
two groups
IVGVS7.et=exactTest(IVER, pair=c(1,3))
#create table with taxonomic rank, logFC, logCPM, P-value and FDR, sorted
by p-value
IVGVS7.tt = topTags(IVGVS7.et, n=nrow(IVER$table), adjust.method="BH",
sort.by="PValue")
IVGVS7.res=IVGVS7.tt@.Data[[1]]
# set significant threshold
alpha = 0.001
#limit table to OTUs with FDR<treshold
IVGVS7.sigtab=IVGVS7.res[(IVGVS7.res$FDR < alpha), ]
# calculate the average abundanc of sequences from the significant OTUs
per sample in each group
abGVsig=apply(otu_table(GV)[rownames(IVGVS7.sigtab),], 1 , mean)
abS7sig=apply(otu_table(S7)[rownames(IVGVS7.sigtab),], 1 , mean)
# save tables
#write.table(IVGVS7.sigtab, "<PATH-TO-DATA>\GV-S7")
#write.table(abGVsig, "<PATH-TO-DATA>\abGVs7-GV")
#write.table(abS7sig, "<PATH-TO-DATA>\abGVs7-S7")

#final layout was done in excel

## shared OTUs of crown galls with soil, root and cane (dataset1).
The analysis was repeated for non-galled graft unions (dataset2). A
paired wilcoxon test was done to find significant differences between
dataset 1+2.

# generate parameter-interactions which are needed for the loop
sample_data(Seasonsdata_144)[,"interA"] <-
interaction(data.frame(sample_data(Seasonsdata_144))[, "Individual"],data.
frame(sample_data(Seasonsdata_144))[, "Replicates"],data.frame(sample_data
(Seasonsdata_144))[, "Seasons"],data.frame(sample_data(Seasonsdata_144))[,
"Source"])
sample_data(Seasonsdata_144)[,"interB"] <-
interaction(data.frame(sample_data(Seasonsdata_144))[, "Source"],data.fram
e(sample_data(Seasonsdata_144))[, "Seasons"])
sample_data(Seasonsdata_144)[,"interC"] <-
interaction(data.frame(sample_data(Seasonsdata_144))[, "Individual"],data.
frame(sample_data(Seasonsdata_144))[, "Replicates"],data.frame(sample_data
(Seasonsdata_144))[, "Seasons"])

# definition of the length of the loop
cycle <-
data.frame(unique(sample_data(Seasonsdata_144)[,"interC"]))$interC

# create the for now emty result table of the loop

```

```

comparison =data.frame(Comp=c(), Shared= c(), Crown_gall=c(),Season=c(),
Ind=c(), Rep=c())

# loop - calculation of shared OTUs for each sample, while keeping the
sample data
for (i in 1:length(cycle)){

  # finding the two samples from the same plant and the same season
for analysing the shared OTUs
  typeR = paste(cycle[i],"root",sep=".") # the complete analysis was
repeated for, soil and cane. Therefore here the "root" was changed into
"cane" or "soil"
  typeT = paste(cycle[i],"trunk",sep=".")

  sampleR=sample_names(sample_data(Seasonsdata_144)[sample_data(Seaso
nsdata_144)[,"interA"]==typeR,])[1]
  sampleT=sample_names(sample_data(Seasonsdata_144)[sample_data(Seaso
nsdata_144)[,"interA"]==typeT,])[1]

  # calculation of the shared amounts of OTUs
shared =
  length(intersect(taxa_names(otu_table(Seasonsdata_144)[otu_table(Se
asonsdata_144)[,sampleR]>0,]),taxa_names(otu_table(Seasonsdata_144)[otu_t
able(Seasonsdata_144)[,sampleT]>0,]))) / (length(setdiff(taxa_names(otu_tab
le(Seasonsdata_144)[otu_table(Seasonsdata_144)[,sampleT]>0,]),taxa_names(
otu_table(Seasonsdata_144)[otu_table(Seasonsdata_144)[,sampleR]>0,]))) +le
ngth(setdiff(taxa_names(otu_table(Seasonsdata_144)[otu_table(Seasonsdata_
144)[,sampleR]>0,]),taxa_names(otu_table(Seasonsdata_144)[otu_table(Seaso
nsdata_144)[,sampleT]>0,]))) +length(intersect(taxa_names(otu_table(Seaso
nsdata_144)[otu_table(Seasonsdata_144)[,sampleR]>0,]),taxa_names(otu_table
(Seasonsdata_144)[otu_table(Seasonsdata_144)[,sampleT]>0,])))

# writing the results in a table
comparison =rbind(comparison,
data.frame(
  Comp=data.frame(sample_data(Seasonsdata_144)[sampleR,"interB"]),
  Shared= shared,

  Crown_gall=data.frame(sample_data(Seasonsdata_144)[sampleR,"Crown_g
all"]),

  Season=data.frame(sample_data(Seasonsdata_144)[sampleR,"Seasons"]),
  Ind=data.frame(sample_data(Seasonsdata_144)[sampleR,"Individual"]),
  Rep=data.frame(sample_data(Seasonsdata_144)[sampleR,"Replicates"]))
)
}

# make table for paired wilcoxon test
comparison$pseudoInd <- comparison$Ind
comparison$pseudoInd[comparison$pseudoInd %in% c(1)] <- 3
comparison$pseudoInd[comparison$pseudoInd %in% c(2)] <- 4
comparison$interA <- interaction(comparison$pseudoInd, comparison$Rep,
comparison$Season)

shared = data.frame(sharedT= c(),sharedN = c())

```

```

for (i in 1:length(unique(comparison$interA))){

    tmp= data.frame(value=comparison$Shared[comparison$interA==
unique(comparison$interA)[i]],
tumor=comparison$Crown_gall[comparison$interA==
unique(comparison$interA)[i]])
    shared = rbind (shared,data.frame(sharedT=
tmp$value[tmp$tumor=="present"],sharedN =
tmp$value[tmp$tumor=="absent"]))
}

# paired wilcoxon test
wilcox.test(shared$sharedT,shared$sharedN, paired=T)

#plot results - not shown in the publication
par(mfrow=c(1,1))
matplot(t(shared), type="b", pch=19, col="lightgray", lty=1)
boxplot(shared$sharedT,shared$sharedN, add=T)

#the analysis was repeated for soil and cane

```
